# Supplementary material
Source: PubMed Central journal article supplement (PMC3801027)
Supplement: 1304145110_pnas.201304145SI.pdf [file 1304145110_pnas.201304145SI.pdf]

# Supporting Information

Sen Santara et al. 10.1073/pnas.1304145110

## SI Methods

**Protein Expression and Purification.** For expression of recombinant full-length heme containing adenylate cyclase from *Leishmania major* (HemAC-Lm) and the catalytic domain ( $\Delta 360$ HemAC-Lm), the corresponding plasmids were transformed separately into competent *Escherichia coli* BL21(DE3). Overnight-grown culture was inoculated in 500 mL of modified terrific broth, incubated at 37 °C for 5 h, and induced with 0.5 mM isopropyl  $\beta$ -D-1-thiogalactopyranoside followed by addition of 0.4 mM  $\delta$ -aminolevulinic acid. *E. coli* cells were grown at 22 °C and 180 rpm for 20 h, pelleted, and resuspended in 50 mM Tris-HCl buffer, pH 7.5, containing 0.5 mM EDTA, 10% glycerol, 150 mM NaCl, protease inhibitor mixture (Roche), 0.5 mM PMSF, and 1.0 mg/mL lysozyme. The resuspended solution was kept for 1 h on ice at 4 °C, and then the cells were broken by sonication. The lysate was centrifuged at  $14,000 \times g$  for 1 h. The supernatant or the crude extract was loaded onto a  $\text{Ni}^{2+}$ -nitrilotriacetate column. After loading the crude extract, the column was washed with 10 column volumes of washing buffer [50 mM Tris-HCl buffer (pH 7.5), 150 mM NaCl, 10% glycerol, and 1 mM PMSF]. The enzyme was eluted with the washing buffer supplemented with 150 mM imidazole and then dialyzed three times against 50 mM Tris-HCl buffer (pH 7.5), 150 mM NaCl, and 10% glycerol. Then the dialyzed fraction was concentrated and loaded into Superdex 200 Columns of ÄKTAprime plus system (GE Healthcare). Purification of  $\Delta 360$ HemAC-Lm catalytic domain was carried out in the same way as above except  $\delta$ -aminolevulinic acid was excluded during induction and no gel filtration was performed after elution from the  $\text{Ni}^{2+}$ -nitrilotriacetate column. Molecular weight and purity of the proteins were confirmed by 12% SDS PAGE.

**Enzyme Assay.** Enzymatic reactions were initiated by addition of 100–150  $\mu\text{g}$  of enzyme to the reaction mixture (final volume of 175  $\mu\text{L}$ ) containing 20 mM Tris-HCl buffer (pH 7.5), 1 mM l-methyl-3-isobutyl-xanthine, 5 mM ATP, 1 mM  $\text{MgCl}_2$ , 10 mM  $\text{MnCl}_2$ , and 10 mM NaCl. Assay incubations were routinely conducted for 15 min at 37 °C, terminated by placing into boiling water bath for 1 min and filtered by Amicon ultra 3.0 kDa (millipore). Sixty microliters of the filtrate was injected in an HPLC chromatographic system (Waters 1525 binary HPLC pump), connected to a Symmetry 300 5- $\mu\text{m}$  C-18 (250  $\times$  4.6 mm) column with a C-18 guard column (Waters). The HPLC run was conducted at isocratic mode with 50 mM phosphate buffer (pH 4.3) containing 0.2% triethylamine-methanol (90:10) at a flow rate of 1 mL/min. Peaks were monitored with a Waters 2489 UV/Visible Detector at 260 nm. The amount of cAMP produced during the enzymatic reaction was determined by external standardization, being the linearity between peak areas and the masses of cAMP injected in the range 0.1–500 nano moles ( $r = 0.999$ ).

**Preparation of Deoxy Protein.** Deoxy ferrous form of HemAC-Lm was prepared by incubating the protein with the strong reducing agent sodium dithionite inside the anaerobic chamber (atmosbag, Aldrich) followed by immediate removal of the excess dithionite by gel filtration on a Sephadex-G25 column (2 mL) equilibrated with  $\text{N}_2$ -equilibrated anaerobic buffer containing 50 mM Tris-HCl buffer (pH 7.4), 50 mM NaCl, and 10% (vol/vol) glycerol. The ferrous deoxygenated sample was collected into an anaerobic rubber-sealed cuvette. Then the UV-visible spectrum was taken for verification of full conversion from ferrous oxygenated form to ferrous deoxygenated form and for measuring protein concentration.

For preparation of anaerobic Sephadex-G25 column within the anaerobic chamber, the column was washed twice with 100  $\mu\text{L}$  sodium dithionite solutions (1 mg/mL) followed by extensive washing with  $\text{N}_2$ -equilibrated anaerobic buffer before sample loading.

**Subcellular Fractionation and Western Blotting.** Subcellular fractionation was performed to separate mitochondria, nuclei, cytosol, and microsomal fractions by the mitochondria isolation kit (Qiagen). The purity of each fraction was checked by Western blot analysis with organelle-specific marker antibodies. The primary antibodies used were as follows: mouse anti-(*L. major*)-HemAC antibody (1:100), rabbit anti-(*L. major*) ascorbate peroxidase (1:50), rabbit anti-(*Leishmania donovani*)-adenosine kinase (1:50), and rabbit anti-(*Trypanosoma brucei*) Bip antibody (1:1,000). The HRP-conjugated secondary antibodies used were anti-rabbit (1:10,000), and anti-mouse (1:6,000).

**Generation of Stable Knockout Strain for HemAC-Lm Alleles.** To generate the constructs pXG-NEO HemAC-Lm and pXG-HYG HemAC-Lm, 1.007 kb from the 5' region and 1 kb from the 3' region of the HemAC-Lm gene were inserted into the modified pXG-NEO and pXG-HYG vectors (1), respectively. Primers 7/8 (Table S1) were used for amplifying the 5' flank, and primers 9/10 (Table S1) were used for amplifying the 3' flank of the gene. The HindIII/SalI-digested 5' flanking region and the SmaI/BamHI-digested 3' flanking region were cloned on either side of ORFs encoding neomycin and hygromycin resistance genes of pXG-NEO and pXG-HYG vectors, respectively. Both constructs were then digested with HindIII and BamHI to get linear fragments of gene deletion constructs HemAC-Lm::NEO and HemAC-Lm::HYG. HemAC-Lm::NEO construct was transfected in log-phase promastigotes to generate heterozygous knockouts (HKOs). HKO strain with HemAC-Lm::NEO construct was maintained at 200  $\mu\text{g}/\text{mL}$  neomycin. To generate double-knockout parasites, HemAC-Lm::HYG construct was transfected into the HKO parasites. HKO was confirmed by PCR using primers 11/12 as external to the gene to detect proper insertion of cassettes into the transformant genomic DNA. The double-knockout strain was unable to grow in growth medium containing 60  $\mu\text{g}/\text{mL}$  neomycin and 100  $\mu\text{g}/\text{mL}$  hygromycin drug.

**Inducible Gene Expression Strain (LmT7.TR) Construction.** A 2.7-kbp fragment encoding T7 RNA polymerase containing N-terminal nuclear localization signal (NLS) was amplified by PCR using primers 13/14 from pLew13 plasmid (Addgene plasmid 24007). The resulting PCR product was digested with BglII and NotI and cloned into *Leishmania* expression vector pLEXSY-hyg2 (Jena Bioscience) with the same enzymes to generate pLEXSY-hyg2-T7polNLS construct. *L. major* promastigotes were transfected with SmaI linearized pLEXSY-hyg2-T7polNLS plasmid. Linearized pLEXSY-hyg2-T7polNL plasmid contains T7 RNA polymerase and its 5'ssu and 3'ssu regions. The 5'ssu and the 3'ssu regions are responsible for homologous recombination into 18S rRNA locus of host chromosome. Hygromycin-resistant transformants were maintained at 200  $\mu\text{g}/\text{mL}$  hygromycin. Finally, hygromycin-resistant transformants were further transfected with AatII-digested pLew114hyg5/vector for the generating LmT7.TR cells. The pLew114hyg5/vector contains tetracycline repressor sequence, and it has the capability for homologous recombination into hygromycin locus of hygromycin cassette. LmT7.TR clones were maintained in 200  $\mu\text{g}/\text{mL}$  neomycin. The incorporation of T7RNA polymerase gene and tetracycline repressor
